# Supplementary material
Source: Research Square preprint supplement (doi:10.21203/rs.3.rs-10348246/v1)
Supplement: Supplementary file 1 [file 5e63975ac9960bb05b86cf56.docx]

| **A. Methods details** | | | | | | |
| --- | --- | --- | --- | --- | --- | --- |
|  | **WATER** | **Hclust** | **TC-seq (Mfuzz)** | **TC-seq**  **(k-means)** | **maSigPro*** | **Trendy*** |
| **Primary analytical objective** | Temporal Trajectory reconstruction | Expression clustering | Soft temporal clustering | Temporal clustering | Regression modeling | Segmented regression |
| **DE capabilities** | No | No | No | No | Yes | Yes |
| **Primary output** | Gene trajectories | Gene clusters | Fuzzy gene clusters | Gene clusters | Significant temporal regression models | Gene-wise segmented regression models |
| **Confidence metric** | Correlation audit & LOO | None | Membership value | None | R2 | Adjusted R2 |
| **Cross-condition comparison capabilities** | Trajectory comparison between conditions | None | None | None | Built-in regression contrasts | None |
| **B. Method performance on the WT forelimb dataset.** | | | | | | |
|  | **WATER** | **Hclust** | **TC-seq (Mfuzz)** | **TC-seq**  **(k-means)** | **maSigPro*** | **Trendy*** |
| **Input genes** | DE genes | DE genes | DE genes | DE genes | All expressed genes | All expressed genes |
| **Genes analyzed** | 11,141 genes | 11,141 genes | 11,141 genes | 11,141 genes | 25,684 genes | 25,684 genes |
| **Output Structure** | 13 unique trajectories | 11 unique clusters | 10 fuzzy clusters | 11 unique clusters | 1,452 interaction genes | 4,331 segmented models |
| **Confidence output** | Median correlation  R = 0.94 | - | Median membership value = 0.51 | - | Median model  R2 = 0.57 | Median Adjusted R2 = 0.79 |
| **Runtime** | Core pipeline: <15 min/condition; trajectory comparison: ~1 h | < 5 min | < 5 min | < 5 min | < 5 min | < 20 min |
| **Supplemental data** | Data S2 and S3 | Data S7 | Data S8 | Data S9 | Data S10 | Data S11 |
| **C. Pairwise agreement of gene assignments** | | | | | | |
| **See also supplemental data S2 and S7-S11.** |  | | **WATER** | **Hclust** | **TC-seq (Mfuzz)** | **TC-seq**  **(k-means)** |
| **WATER** | | 1.0 | 0.64 | 0.71 | 0.65 |
| **Hclust** | | 0.64 | 1.0 | 0.54 | 0.57 |
| **TC-seq (Mfuzz)** | | 0.71 | 0.54 | 1.0 | 0.61 |
| **TC-seq (k-means)** | | 0.65 | 0.57 | 0.61 | 1.0 |

**Table 1. Benchmarking summary of WATER and existing methods for temporal transcriptomic analysis.** (A) Summary of the primary analytical objectives, primary outputs, confidence metrics, and cross-condition comparison capabilities of WATER and five existing methods for temporal transcriptomic analysis. WATER and hierarchical clustering reconstruct temporal gene expression trajectories from differentially expressed genes, whereas TC-seq performs either Mfuzz or k-means based clustering of temporal expression profiles. In contrast, maSigPro and Trendy are regression-based methods that identify statistically significant temporal expression changes rather than reconstructing global trajectory architectures and are therefore reported according to their native outputs. (B) Performance of each method on the WT embryonic forelimb RNA-seq dataset. WATER, hierarchical clustering, and TC-seq were applied to the same set of 11,141 differentially expressed genes identified by IsoDE2, whereas maSigPro and Trendy were applied to the complete set of 25,684 expressed genes in accordance with their intended workflows. Confidence metrics are reported only for methods that provide native confidence estimates. Because confidence metrics are method-specific, values are reported as native outputs and are not directly comparable across methods. Runtime was measured on identical hardware using default parameters. Complete outputs for each method are provided in Supplementary Data S7 (hierarchical clustering), S8 (TC-seq Mfuzz), S9 (TC-seq k-means), S10 (maSigPro), and S11 (Trendy). (C) Pairwise agreement of gene assignments among trajectory-based methods. Values represent the proportion of genes assigned to corresponding trajectories following optimal matching of trajectory labels between methods. Agreement values compare only methods that reconstruct gene trajectories or clusters and therefore do not include maSigPro or Trendy, whose primary outputs are regression models rather than trajectory assignments.
